# Supplementary material for: Enhancement of anti-STLV-1/HTLV-1 immune responses through multimodal effects of anti-CCR4 antibody
Source: PubMed Central journal article supplement (PMC4890010; doi:10.1038/srep27150), 2016-06-02
Supplement: srep27150-s1.pdf [file srep27150-s1.pdf]

## Supplementary Information

# **Enhancement of anti-STLV-1/HTLV-1 immune responses through multimodal effects of anti-CCR4 antibody**

Kenji Sugata<sup>1,2</sup>, Jun-ichirou Yasunaga<sup>1</sup>, Michi Miura<sup>1</sup>, Hirofumi Akari<sup>3</sup>, Atae Utsunomiya<sup>4</sup>, Kisato Nosaka<sup>5</sup>, Yuko Watanabe<sup>6</sup>, Hitoshi Suzushima<sup>6</sup>, Ki-Ryang Koh<sup>7</sup>, Masanori Nakagawa<sup>8</sup>, Michinori Kohara<sup>9</sup>, Masao Matsuoka<sup>1</sup>

<sup>1</sup>Laboratory of Virus Control, Institute for Virus Research, Kyoto University, Kyoto, Japan

<sup>2</sup>Japan Society for the Promotion of Science (JSPS), Chiyoda-ku, Tokyo, Japan <sup>3</sup>Laboratory of Evolutional Virology, Institute for Virus Research, Kyoto University, Kyoto, Japan

<sup>4</sup>Department of Hematology, Imamura Bun-in Hospital, Kagoshima, Japan

<sup>5</sup>Department of Hematology, Kumamoto University School of Medicine, Kumamoto, Japan

<sup>6</sup>Department of Hematology, Kumamoto Shinto General Hospital, Kumamoto, Japan

<sup>7</sup>Department of Hematology, Osaka General Hospital of West Japan Railway Company, Osaka, Japan

<sup>8</sup>Department of Neurology, Graduate School of Medical Science, Kyoto Prefectural University of Medicine, Kyoto, Japan

<sup>9</sup>Department of Microbiology and Cell Biology, Tokyo Metropolitan Institute of Medical Science, Tokyo, Japan

**Table S1**  
Sequences of sTax overlap peptides used in this study.

| Pep No | Name       | Start | End | Sequence              | Hydro | MWt    |
|--------|------------|-------|-----|-----------------------|-------|--------|
| 1      | sTax pep1  | 1     | 20  | MAHFPGFGQSLLYGYPVYVF  | 0.69  | 2293.7 |
| 2      | sTax pep2  | 7     | 26  | FGQSLLYGYPVYVFGDCVQG  | 0.58  | 2212.5 |
| 3      | sTax pep3  | 13    | 32  | YGYPVYVFGDCVQGDWCPIS  | 0.61  | 2268.6 |
| 4      | sTax pep4  | 19    | 38  | VFGDCVQGDWCPISGGLCSA  | 0.55  | 2014.3 |
| 5      | sTax pep5  | 25    | 44  | QGDWCPISGGLCSARLHRHA  | 0.33  | 2164.5 |
| 6      | sTax pep6  | 31    | 50  | ISGGLCSARLHRHALLATCP  | 0.45  | 2076.5 |
| 7      | sTax pep7  | 37    | 56  | SARLHRHALLATCPEHQITW  | 0.39  | 2340.7 |
| 8      | sTax pep8  | 43    | 62  | HALLATCPEHQITWDPIDGR  | 0.38  | 2273.6 |
| 9      | sTax pep9  | 49    | 68  | CPEHQITWDPIDGRVIGSAL  | 0.41  | 2207.5 |
| 10     | sTax pep10 | 55    | 74  | TWDPIDGRVIGSALQFLIPR  | 0.48  | 2254.6 |
| 11     | sTax pep11 | 61    | 80  | GRVIGSALQFLIPRLPSFPT  | 0.55  | 2169.6 |
| 12     | sTax pep12 | 67    | 86  | ALQFLIPRLPSFPTQRTSKT  | 0.38  | 2301.7 |
| 13     | sTax pep13 | 73    | 92  | PRLPSFPTQRTSKTLKVLTP  | 0.27  | 2267.7 |
| 14     | sTax pep14 | 79    | 98  | PTQRTSKTLKVLTPPATHTT  | 0.18  | 2178.5 |
| 15     | sTax pep15 | 85    | 104 | KTLKVLTPPATHTTPNIPPS  | 0.34  | 2113.5 |
| 16     | sTax pep16 | 91    | 110 | TPPATHTTPNIPPSFFQAVR  | 0.38  | 2179.5 |
| 17     | sTax pep17 | 97    | 116 | TTPNIPPSFFQAVRKYSPIFR | 0.34  | 2353.7 |
| 18     | sTax pep18 | 103   | 122 | PSFFQAVRKYSPIFRNGYMEP | 0.27  | 2421.8 |
| 19     | sTax pep19 | 109   | 128 | VRKYSPIFRNGYMEPTLGQQL | 0.22  | 2384.8 |
| 20     | sTax pep20 | 115   | 134 | FRNGYMEPTLGQQLPTLSFP  | 0.41  | 2296.6 |
| 21     | sTax pep21 | 121   | 140 | EPTLGQQLPTLSFPDPGLRP  | 0.37  | 2163.5 |
| 22     | sTax pep22 | 127   | 146 | QLPTLSFPDPGLRPQONLYTL | 0.46  | 2270.6 |
| 23     | sTax pep23 | 133   | 152 | FPDPGLRPQONLYTLWGNVSV | 0.45  | 2273.6 |
| 24     | sTax pep24 | 139   | 158 | RPQONLYTLWGNVSVCMYLYQ | 0.54  | 2448.9 |
| 25     | sTax pep25 | 145   | 164 | TLWGNVSVCMYLYQLSPFIT  | 0.71  | 2285.7 |
| 26     | sTax pep26 | 151   | 170 | VVCMYLYQLSPFITWPLLP   | 0.87  | 2370.9 |
| 27     | sTax pep27 | 157   | 176 | YQLSPFITWPLLPVIFCHP   | 0.84  | 2358.8 |
| 28     | sTax pep28 | 163   | 182 | ITWPLLPVIFCHPGQLGAF   | 0.83  | 2246.7 |
| 29     | sTax pep29 | 169   | 188 | PHVIFCHPGQLGAFITNVPY  | 0.64  | 2210.6 |
| 30     | sTax pep30 | 175   | 194 | HPGQLGAFITNVPYKRMEEL  | 0.30  | 2300.7 |
| 31     | sTax pep31 | 181   | 200 | AFLITNVPYKRMEELLYKIFL | 0.51  | 2489.0 |
| 32     | sTax pep32 | 187   | 206 | PYKRMEELLYKIFLNTGATI  | 0.39  | 2400.9 |
| 33     | sTax pep33 | 193   | 212 | ELLYKIFLNTGATIILPEDC  | 0.57  | 2266.7 |
| 34     | sTax pep34 | 199   | 218 | FLNTGATIILPEDCLPTTLF  | 0.66  | 2179.6 |
| 35     | sTax pep35 | 205   | 224 | TIILPEDCLPTTLFQPTRAP  | 0.54  | 2226.6 |
| 36     | sTax pep36 | 211   | 230 | DCLPTTLFQPTRAPATLTAW  | 0.51  | 2203.6 |
| 37     | sTax pep37 | 217   | 236 | LFQPTRAPATLTAWQNGLLP  | 0.50  | 2195.6 |
| 38     | sTax pep38 | 223   | 242 | APATLTAWQNGLLPFGSTLT  | 0.52  | 2130.4 |
| 39     | sTax pep39 | 229   | 248 | AWQNGLLPFGSTLTTPLGIW  | 0.66  | 2243.6 |
| 40     | sTax pep40 | 235   | 254 | LPGSTLTTPLGIWTFDGT    | 0.59  | 2196.5 |
| 41     | sTax pep41 | 241   | 260 | LTTPLGIWTFDGTMPVSGP   | 0.57  | 2091.4 |
| 42     | sTax pep42 | 247   | 266 | IWTFTDGTMPVSGPCPRDGG  | 0.37  | 2165.4 |
| 43     | sTax pep43 | 253   | 272 | GTPMVSGPCPRDGGPSLVLQ  | 0.35  | 2039.4 |
| 44     | sTax pep44 | 259   | 278 | GPCPRDGGPSLVLQSSSFIF  | 0.43  | 2135.4 |
| 45     | sTax pep45 | 265   | 284 | GQPSLVLQSSSFIFHKFQTK  | 0.38  | 2279.6 |
| 46     | sTax pep46 | 271   | 290 | LQSSSFIFHKFQTKAYHPSF  | 0.40  | 2400.7 |
| 47     | sTax pep47 | 277   | 296 | IFHKFQTKAYHPSFLLSHGL  | 0.49  | 2371.8 |
| 48     | sTax pep48 | 283   | 302 | TKAYHPSFLLSHGLIQYSSF  | 0.49  | 2296.6 |
| 49     | sTax pep49 | 289   | 308 | SFLLSHGLIQYSSFHNLHLL  | 0.65  | 2326.7 |
| 50     | sTax pep50 | 295   | 314 | GLIQYSSFHNLHLLFEEYTN  | 0.46  | 2425.7 |
| 51     | sTax pep51 | 301   | 320 | SFHNLHLLFEEYTNIPISLL  | 0.62  | 2400.8 |
| 52     | sTax pep52 | 307   | 326 | LLFEEYTNIPISLLFNKEEA  | 0.44  | 2383.7 |
| 53     | sTax pep53 | 313   | 332 | TNIPISLLFNKEEAANDTDHE | 0.11  | 2300.5 |
| 54     | sTax pep54 | 319   | 338 | LLFNKEEAANDTDHEPQMLPG | 0.12  | 2298.5 |
| 55     | sTax pep55 | 325   | 344 | EANDTDHEPQMLPGGLKPPN  | 0.06  | 2160.4 |
| 56     | sTax pep56 | 331   | 350 | HEPQMLPGGLKPPNEKHFRE  | 0.09  | 2341.7 |
| 57     | sTax pep57 | 334   | 353 | QMLPGGLKPPNEKHFRETVD  | 0.12  | 2293.6 |

**Table S2**

Sequences of SBZ overlap peptides and vaccinia peptides used in this study.

| Pep No | Name      | Start | End | Sequence              | Hydro | MWt    |
|--------|-----------|-------|-----|-----------------------|-------|--------|
| 1      | SBZ pep1  | 1     | 20  | MAASGPFRCPLVPCPEDLLV  | 0.59  | 2115.6 |
| 2      | SBZ pep2  | 7     | 26  | FRCLPVPCEPDLVDDLVDG   | 0.50  | 2215.6 |
| 3      | SBZ pep3  | 13    | 32  | PCPEDLLVDDLVDGLLSLEE  | 0.40  | 2184.5 |
| 4      | SBZ pep4  | 19    | 38  | LVDDLVDGLLSLEEDLNKQR  | 0.17  | 2284.6 |
| 5      | SBZ pep5  | 25    | 44  | DGLLSLEEDLNKQRTEEEESV | -0.05 | 2304.5 |
| 6      | SBZ pep6  | 31    | 50  | EEDLNKQRTEEEESVLDGLLS | -0.05 | 2304.5 |
| 7      | SBZ pep7  | 37    | 56  | QRTEEEESVLDGLLSLEEECY | 0.14  | 2342.5 |
| 8      | SBZ pep8  | 43    | 62  | SVLDGLLSLEEECYGQQQVP  | 0.33  | 2207.5 |
| 9      | SBZ pep9  | 49    | 68  | LSLEEECYGQQQVPLREESP  | 0.16  | 2334.6 |
| 10     | SBZ pep10 | 55    | 74  | CYGQQQVPLREESPPRGETY  | 0.11  | 2337.6 |
| 11     | SBZ pep11 | 61    | 80  | VPLREESPPRGETYRDRQRR  | -0.20 | 2497.8 |
| 12     | SBZ pep12 | 67    | 86  | SPPRGETYRDRQRRAEEKRR  | -0.44 | 2515.8 |
| 13     | SBZ pep13 | 73    | 92  | TYRDRQRRAEEKRRKRERE   | -0.67 | 2747.1 |
| 14     | SBZ pep14 | 79    | 98  | RRAEEKRRKREREKEEEEQ   | -0.76 | 2700.0 |
| 15     | SBZ pep15 | 85    | 104 | RKRKREREKEEEEQIAEFLR  | -0.40 | 2660.0 |
| 16     | SBZ pep16 | 91    | 110 | REKEEEEQIAEFLRKKEEK   | -0.39 | 2576.9 |
| 17     | SBZ pep17 | 97    | 116 | EQIAEFLRKKEEKARRRRR   | -0.39 | 2628.1 |
| 18     | SBZ pep18 | 103   | 122 | LRKKEEKARRRRREEEKAA   | -0.61 | 2568.0 |
| 19     | SBZ pep19 | 109   | 128 | KKARRRRREEEKAAYRARRK  | -0.61 | 2615.1 |
| 20     | SBZ pep20 | 115   | 134 | RREEEKAAYRARRKREEEER  | -0.61 | 2647.9 |
| 21     | SBZ pep21 | 121   | 140 | AAYRARRKREEEERLERKRR  | -0.52 | 2659.0 |
| 22     | SBZ pep22 | 127   | 146 | RKREEEERLERKRRLAEQGA  | -0.45 | 2539.9 |
| 23     | SBZ pep23 | 133   | 152 | ERLERKRRLAEQGAKRARQR  | -0.40 | 2507.9 |
| 24     | SBZ pep24 | 139   | 158 | RRLAEQGAKRARQRDTRKEK  | -0.47 | 2453.8 |
| 25     | SBZ pep25 | 145   | 164 | GAKRARQRDTRKEKIKELGV  | -0.29 | 2339.7 |
| 26     | SBZ pep26 | 151   | 170 | QRDTRKEKIKELGVDGYARQ  | -0.22 | 2390.7 |
| 27     | SBZ pep27 | 157   | 176 | EKIKELGVDGYARQLESEVD  | -0.01 | 2278.5 |
| 28     | SBZ pep28 | 163   | 182 | GVDGYARQLESEVDSLEAER  | -0.03 | 2223.3 |
| 29     | SBZ pep29 | 169   | 188 | RQLESEVDSLEAERKRLLE   | -0.09 | 2428.7 |
| 30     | SBZ pep30 | 175   | 194 | VDSLEAERKRLLEQEKEDLMG | -0.03 | 2359.7 |
| 31     | SBZ pep31 | 181   | 200 | ERKRLLEQEKEDLMGEVNYWQ | 0.03  | 2564.9 |
| 32     | SBZ pep32 | 187   | 206 | QEKEDLMGEVNYWQGRLQAM  | 0.13  | 2425.7 |
| 33     | SBZ pep33 | 190   | 209 | EDLMGEVNYWQGRLQAMWSQ  | 0.31  | 2441.7 |

| Pep No | Name   | Start | End | Sequence   | Hydro | MWt    |
|--------|--------|-------|-----|------------|-------|--------|
| 1      | VV B8R | 20    | 27  | TSYKFESV   | 0.08  | 960.1  |
| 2      | VV L2R | 53    | 61  | VIIYFTVRL  | 0.73  | 1123.4 |
| 3      | VV K3L | 6     | 15  | YSLPNAGDVI | 0.30  | 1048.2 |

**Table S3**

Sequences of Tax overlap peptides used in this study.

| Pep No | Name      | Start | End | Sequence             | Hydro | MWt    |
|--------|-----------|-------|-----|----------------------|-------|--------|
| 1      | Tax pep1  | 1     | 20  | MAHFPGFGQSLFLGYPVYVF | 0.73  | 2277.7 |
| 2      | Tax pep2  | 7     | 26  | FGQSLFLGYPVYVFGDCVQG | 0.62  | 2196.5 |
| 3      | Tax pep3  | 13    | 32  | FGYPVYVFGDCVQGDWCPIS | 0.64  | 2252.6 |
| 4      | Tax pep4  | 19    | 38  | VFGDCVQGDWCPISGGLCSA | 0.55  | 2014.3 |
| 5      | Tax pep5  | 25    | 44  | QGDWCPISGGLCSARLHRHA | 0.33  | 2164.5 |
| 6      | Tax pep6  | 31    | 50  | ISGGLCSARLHRHALLATCP | 0.45  | 2076.5 |
| 7      | Tax pep7  | 37    | 56  | SARLHRHALLATCPEHQITW | 0.39  | 2340.7 |
| 8      | Tax pep8  | 43    | 62  | HALLATCPEHQITWDPIDGR | 0.38  | 2273.6 |
| 9      | Tax pep9  | 49    | 68  | CPEHQITWDPIDGRVIGSAL | 0.41  | 2207.5 |
| 10     | Tax pep10 | 55    | 74  | TWDPIDGRVIGSALQFLIPR | 0.48  | 2254.6 |
| 11     | Tax pep11 | 61    | 80  | GRVIGSALQFLIPRLPSFPT | 0.55  | 2169.6 |
| 12     | Tax pep12 | 67    | 86  | ALQFLIPRLPSFPTQRTSKT | 0.38  | 2301.7 |
| 13     | Tax pep13 | 73    | 92  | PRLPSFPTQRTSKTLKVLTP | 0.27  | 2267.7 |
| 14     | Tax pep14 | 79    | 98  | PTQRTSKTLKVLTPPITHTT | 0.25  | 2220.6 |
| 15     | Tax pep15 | 85    | 104 | KTLKVLTPPITHTTPNIPPS | 0.40  | 2155.6 |
| 16     | Tax pep16 | 91    | 110 | TPPITHTTPNIPPSFLQAMR | 0.44  | 2219.6 |
| 17     | Tax pep17 | 97    | 116 | TPNIPPSFLQAMRKYSFPR  | 0.33  | 2351.8 |
| 18     | Tax pep18 | 103   | 122 | PSFLQAMRKYSFPRNGYMEP | 0.26  | 2419.8 |
| 19     | Tax pep19 | 109   | 128 | MRKYSFPRNGYMEPTLGQHL | 0.23  | 2425.8 |
| 20     | Tax pep20 | 115   | 134 | FRNGYMEPTLGQHLPTLSFP | 0.43  | 2305.7 |
| 21     | Tax pep21 | 121   | 140 | EPTLGQHLPTLSFPDPGLRP | 0.38  | 2172.5 |
| 22     | Tax pep22 | 127   | 146 | HLPTLSFPDPGLRPQNLYTL | 0.47  | 2279.6 |
| 23     | Tax pep23 | 133   | 152 | FPDPGLRPQNLYTLWGGSVV | 0.48  | 2216.5 |
| 24     | Tax pep24 | 139   | 158 | RPQNLYTLWGGSVVCMYLYQ | 0.57  | 2391.8 |
| 25     | Tax pep25 | 145   | 164 | TLWGGSVVCMYLYQLSPPIT | 0.74  | 2228.7 |
| 26     | Tax pep26 | 151   | 170 | VVCMYLYQLSPPITWPLLPH | 0.87  | 2370.9 |
| 27     | Tax pep27 | 157   | 176 | YQLSPPITWPLLPHVIFCHP | 0.84  | 2358.8 |
| 28     | Tax pep28 | 163   | 182 | ITWPLLPHVIFCHPGQLGAF | 0.83  | 2246.7 |
| 29     | Tax pep29 | 169   | 188 | PHVIFCHPGQLGAFLTNVPY | 0.64  | 2210.6 |
| 30     | Tax pep30 | 175   | 194 | HPGQLGAFLTNVPYKRIEEL | 0.33  | 2282.6 |
| 31     | Tax pep31 | 181   | 200 | AFLTNVPYKRIEELLYKISL | 0.45  | 2410.9 |
| 32     | Tax pep32 | 187   | 206 | PYKRIEELLYKISLTTGALI | 0.44  | 2321.8 |
| 33     | Tax pep33 | 193   | 212 | ELLYKISLTTGALIILPEDC | 0.60  | 2205.7 |
| 34     | Tax pep34 | 199   | 218 | SLTTGALIILPEDCLPTTLF | 0.68  | 2118.5 |
| 35     | Tax pep35 | 205   | 224 | LIILPEDCLPTTLFQPARAP | 0.61  | 2208.7 |
| 36     | Tax pep36 | 211   | 230 | DCLPTTLFQPARAPVTLTAW | 0.56  | 2201.6 |
| 37     | Tax pep37 | 217   | 236 | LFQPARAPVTLTAWQNGLLP | 0.54  | 2193.6 |
| 38     | Tax pep38 | 223   | 242 | APVTLTAWQNGLLPFHSTLT | 0.58  | 2167.5 |
| 39     | Tax pep39 | 229   | 248 | AWQNGLLPFHSTLTPGLIW  | 0.68  | 2252.6 |
| 40     | Tax pep40 | 235   | 254 | LPFHSTLTPGLIWTFTDGT  | 0.60  | 2205.5 |
| 41     | Tax pep41 | 241   | 260 | LTPGLIWTFTDGTMPISGP  | 0.60  | 2105.4 |
| 42     | Tax pep42 | 247   | 266 | IWTFTDGTMPISGCPKDGQ  | 0.40  | 2151.5 |
| 43     | Tax pep43 | 253   | 272 | GTPMISGCPKDGQPSLVLQ  | 0.38  | 2025.4 |
| 44     | Tax pep44 | 259   | 278 | GPCPKDGQPSLVLQSSSFIF | 0.44  | 2107.4 |
| 45     | Tax pep45 | 265   | 284 | GQPSLVLQSSSFIFHKFQTK | 0.38  | 2279.6 |
| 46     | Tax pep46 | 271   | 290 | LQSSSFIFHKFQTKAYHPSF | 0.40  | 2400.7 |
| 47     | Tax pep47 | 277   | 296 | IFHKFQTKAYHPSFLLSHGL | 0.49  | 2371.8 |
| 48     | Tax pep48 | 283   | 302 | TKAYHPSFLLSHGLIQYSSF | 0.49  | 2296.6 |
| 49     | Tax pep49 | 289   | 308 | SFLLSHGLIQYSSFHNLHLL | 0.65  | 2326.7 |
| 50     | Tax pep50 | 295   | 314 | GLIQYSSFHNLHLLFEEYTN | 0.46  | 2425.7 |
| 51     | Tax pep51 | 301   | 320 | SFHNLHLLFEEYTNIPISLL | 0.62  | 2400.8 |
| 52     | Tax pep52 | 307   | 326 | LLFEEYTNIPISLLFNEKEA | 0.44  | 2383.7 |
| 53     | Tax pep53 | 313   | 332 | TNIPISLLFNEKEADDNDHE | 0.06  | 2314.5 |
| 54     | Tax pep54 | 319   | 338 | LLFNEKEADDNDHEPQISPG | 0.02  | 2268.4 |
| 55     | Tax pep55 | 325   | 344 | EADDNDHEPQISPGGLEPPS | 0.00  | 2104.1 |
| 56     | Tax pep56 | 331   | 350 | HEPQISPGGLEPPSEKHFRE | 0.08  | 2271.5 |
| 57     | Tax pep57 | 334   | 353 | QISPGGLEPPSEKHFRETEV | 0.11  | 2237.5 |

**Table S4**

Sequences of HBZ overlap peptides used in this study.

| Pep No | Name      | Start | End | Sequence              | Hydro | MWt    |
|--------|-----------|-------|-----|-----------------------|-------|--------|
| 1      | HBZ pep1  | 1     | 20  | MAASGLFRCLPVPCPEDLLV  | 0.63  | 2131.6 |
| 2      | HBZ pep2  | 7     | 26  | FRCLPVPCPEDLLVEELVDG  | 0.51  | 2243.6 |
| 3      | HBZ pep3  | 13    | 32  | PCPEDLLVEELVDGLLSLEE  | 0.29  | 2128.3 |
| 4      | HBZ pep4  | 19    | 38  | LVEELVDGLLSLEEELKDKE  | 0.03  | 2216.4 |
| 5      | HBZ pep5  | 25    | 44  | DGLLSLEEELKDKEEEEAVL  | -0.12 | 2204.3 |
| 6      | HBZ pep6  | 31    | 50  | EEELKDKEEEEAVLDGLLSL  | 0.01  | 2288.5 |
| 7      | HBZ pep7  | 37    | 56  | KEEEEAVLDGLLSLEEEESRG | -0.03 | 2232.4 |
| 8      | HBZ pep8  | 43    | 62  | VDGLLSLEEEESRGRRLRRGP | 0.09  | 2252.6 |
| 9      | HBZ pep9  | 49    | 68  | SLEEESRGRRLRRGPPGEKAP | -0.16 | 2221.5 |
| 10     | HBZ pep10 | 55    | 74  | RGRLRRGPPGEKAPPRGETH  | -0.17 | 2224.5 |
| 11     | HBZ pep11 | 61    | 80  | GPPGEKAPPRGETHRDRQRR  | -0.30 | 2297.5 |
| 12     | HBZ pep12 | 67    | 86  | APPRGETHRDRQRRAEEKRRK | -0.47 | 2473.8 |
| 13     | HBZ pep13 | 73    | 92  | THRDRQRRAEEKRRKREKERE | -0.71 | 2693.0 |
| 14     | HBZ pep14 | 79    | 98  | RRAEEKRRKREKEREKEEEKQ | -0.78 | 2671.0 |
| 15     | HBZ pep15 | 85    | 104 | RKRKEREKKEEEKQIAEYLK  | -0.46 | 2619.0 |
| 16     | HBZ pep16 | 91    | 110 | REKEEEKQIAEYLKRKEEEK  | -0.42 | 2592.9 |
| 17     | HBZ pep17 | 97    | 116 | KQIAEYLKRKEEEKARRRRR  | -0.43 | 2644.1 |
| 18     | HBZ pep18 | 103   | 122 | LKRKEEEKARRRRRAEKKAA  | -0.56 | 2510.0 |
| 19     | HBZ pep19 | 109   | 128 | EKARRRRRAEKKAAADVARRK | -0.55 | 2451.9 |
| 20     | HBZ pep20 | 115   | 134 | RRAEKKAADVARRKQEEQER  | -0.50 | 2454.7 |
| 21     | HBZ pep21 | 121   | 140 | AADVARRKQEEQERRERKWR  | -0.42 | 2597.9 |
| 22     | HBZ pep22 | 127   | 146 | RKQEEQERRERKWRQGAEKA  | -0.49 | 2598.9 |
| 23     | HBZ pep23 | 133   | 152 | ERRERKWRQGAEKAKQHSAR  | -0.40 | 2507.8 |
| 24     | HBZ pep24 | 139   | 158 | WRQGAEKAKQHSARKEKMQE  | -0.26 | 2426.8 |
| 25     | HBZ pep25 | 145   | 164 | KAKQHSARKEKMQELGIDGY  | -0.13 | 2317.7 |
| 26     | HBZ pep26 | 151   | 170 | ARKEKMQELGIDGYTRQLEG  | -0.04 | 2322.6 |
| 27     | HBZ pep27 | 157   | 176 | QELGIDGYTRQLEGEVESLE  | 0.10  | 2265.4 |
| 28     | HBZ pep28 | 163   | 182 | GYTRQLEGEVESLEAERRKL  | -0.06 | 2363.6 |
| 29     | HBZ pep29 | 169   | 188 | EGEVESLEAERRKLLQEKED  | -0.21 | 2387.6 |
| 30     | HBZ pep30 | 175   | 194 | LEAERRKLLQEKEDLMGEVN  | -0.05 | 2400.7 |
| 31     | HBZ pep31 | 181   | 200 | KLLQEKEDLMGEVNYWQGRL  | 0.18  | 2449.8 |
| 32     | HBZ pep32 | 187   | 206 | EDLMGEVNYWQGRLEAMWLQ  | 0.37  | 2468.8 |

**Table S5**

## Clinical information of mogamulizumab-treated ATL patients

| Patient ID | Disease status<br>at analysis | Number of Mogamulizumab<br>administration (times) | Time after Mogamulizumab<br>treatment (weeks) |
|------------|-------------------------------|---------------------------------------------------|-----------------------------------------------|
| CR1        | CR                            | 5                                                 | 87                                            |
| CR2        | CR                            | 4                                                 | 13                                            |
| CR3        | CR                            | 8                                                 | 44                                            |
| CR4        | CR                            | 6                                                 | 173                                           |
| CR5        | CR                            | 5                                                 | 56                                            |
| SD6        | SD                            | 3                                                 | 11                                            |
| SD7        | SD                            | 3                                                 | 7                                             |
| SD8        | SD                            | 8                                                 | 9                                             |
| PD9        | PD                            | 1                                                 | 3                                             |
| PD10       | PD                            | 1                                                 | 26                                            |



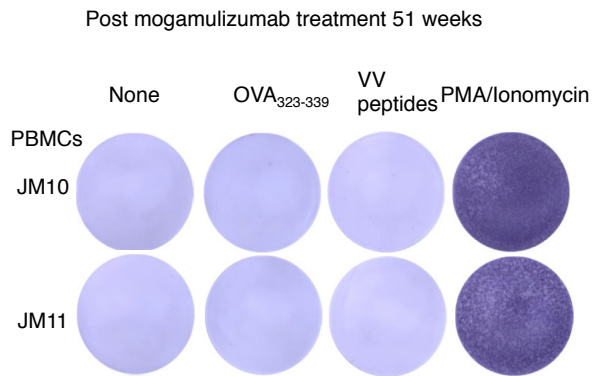

**Figure S1 Positive and negative controls in IFN- $\gamma$  ELISPOT assay of monkey PBMCs.**

Monkey PBMCs were stimulated with OVA<sub>323-339</sub> and VV peptides (T cell epitopes in H-2<sup>b</sup> (C57BL/6) haplotypes) as negative control. We stimulated T cells by PMA and ionomycin as a positive control.



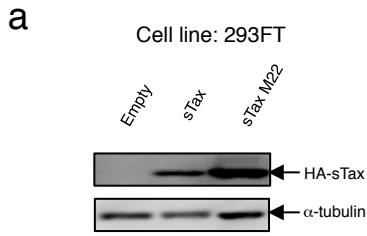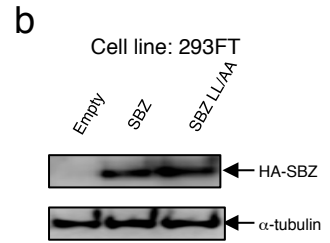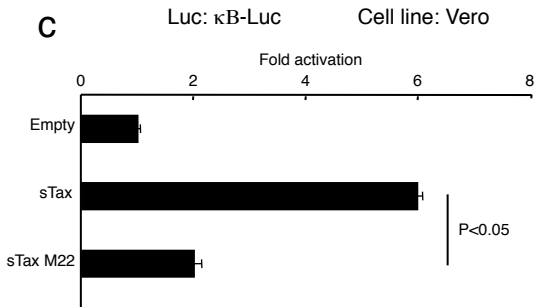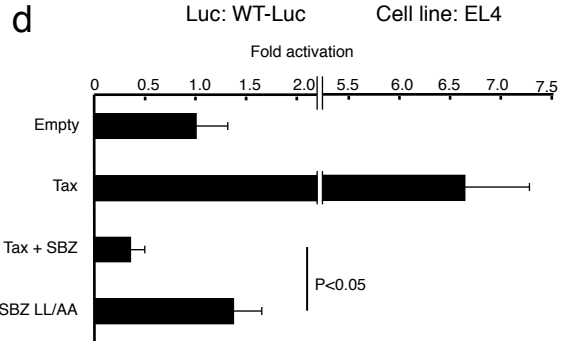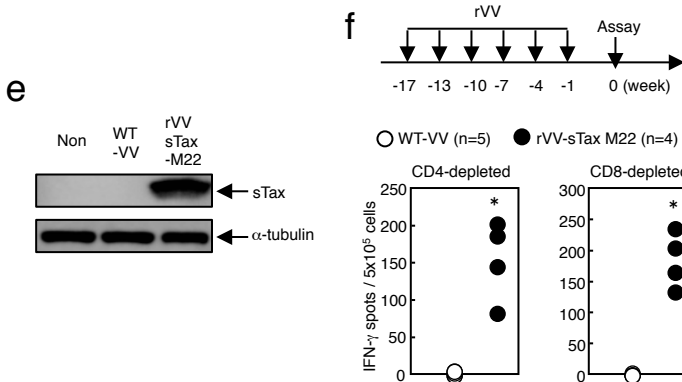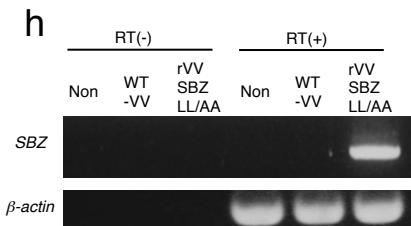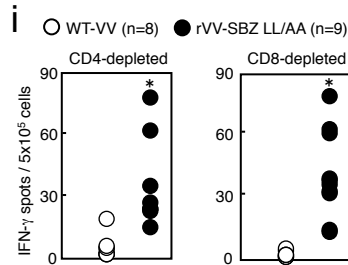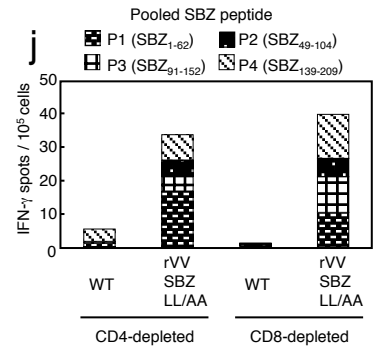

**Figure S2 Generation of STLV-1 viral antigen-expressing vaccinia virus LC16m8 strain.**

**(a, b)** Point mutations in HTLV-1 Tax M22 **(a)** and HBZ LL/AA **(b)** were inserted into the equivalent sites in sTax and SBZ. 293FT cells were transfected with HA-tagged WT or mutant plasmid. After 48 hours of transfection, expression level was determined by western blot using rabbit polyclonal anti-HA antibody. Full-length data is presented in Supplementary Figure 1a and b. Those constructs expressed mutant viral antigen at a similar level to WT constructs. **(c, d)** The effect of viral proteins on transcriptional activity was impaired by the point mutations in sTax and SBZ. **(c)** Vero cells were transfected with kB-Luc and sTax or sTax M22 and the luciferase activity was measured. **(d)** EL4 cells were transfected with WT-Luc, containing Tax-inducible CREs of HTLV-1 LTR, Tax and SBZ or SBZ LL/AA. The cells were harvested after 48 hours. Relative luciferase activities were calculated as the ratio of firefly to *Renilla* luciferase activities. The bars represent the mean  $\pm$  SD of triplicate experiments. **(e-j)** rVV vaccination induces an antigen-specific T-cell response in mice. sTax **(e)** and SBZ **(h)** expression from the generated rVV strains were confirmed by Western blot or RT-PCR in RK13 cells after 48 hours of post-infection, respectively. Expression of sTax or HBZ mutants was detected using anti-Tax antibody (MI73) or SBZ primer set, respectively. Full-length data is presented in Supplementary Figure 1c and d. rVV vaccination and detection of the specific immune response in mice were performed as shown in **(f)**. CD4- or CD8-depleted splenocytes were stimulated with pooled overlapped peptides of sTax **(f)** or SBZ **(i)** and T-cell responses were measured by ELISPOT. The total numbers of spots from the four pools (P1-P4) are shown. **(g, j)** The proportion of T-cell responses induced by each of the four pooled-peptides of sTax **(g)** and SBZ **(j)** is shown. A representative result is shown from at least two similar experiments. \*,  $P < 0.05$  by t-test.

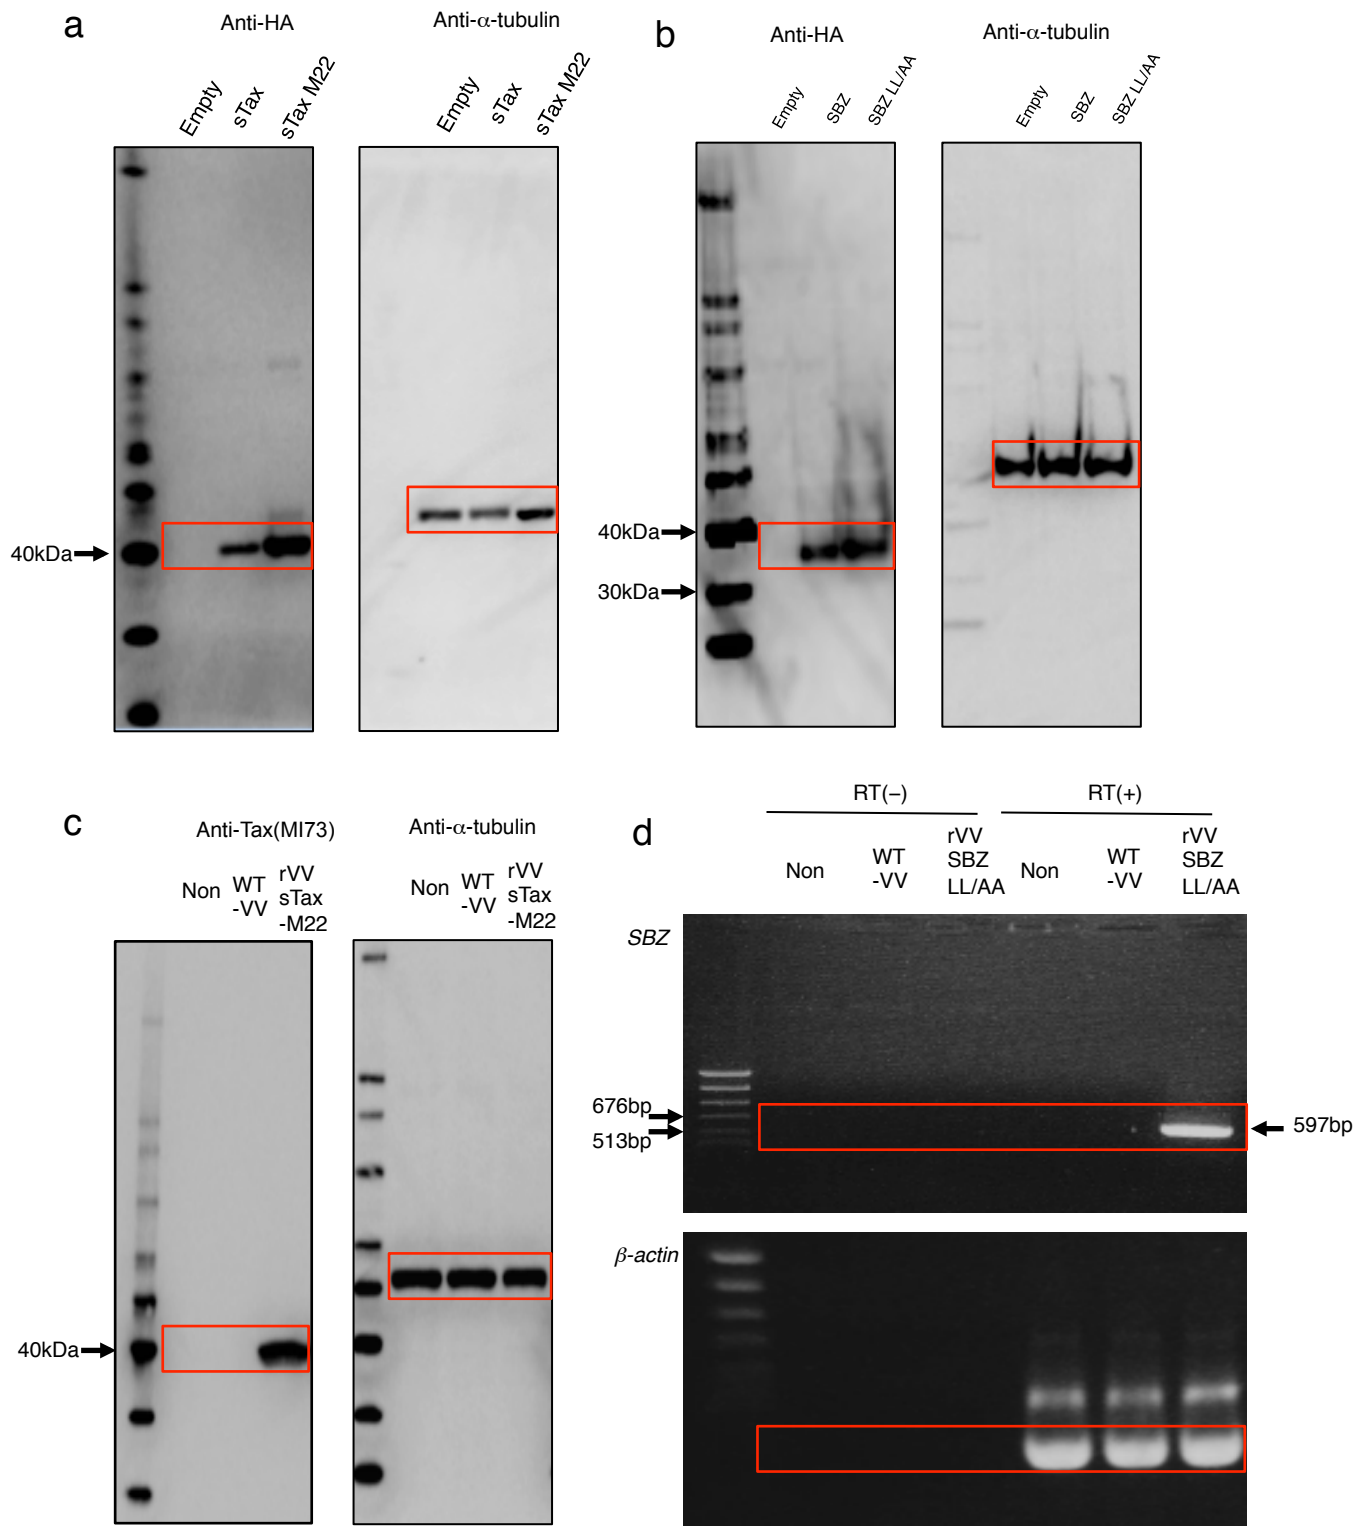

Figure S3 Full-length data of Figure S1

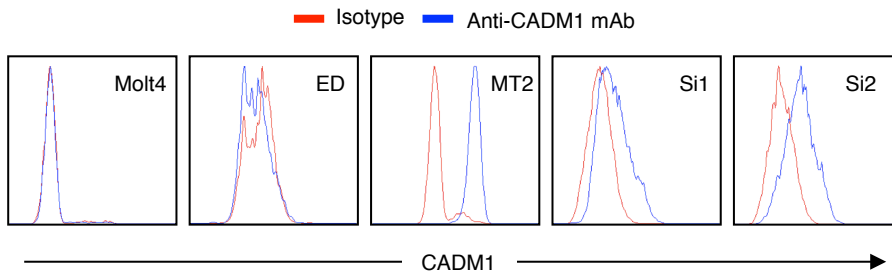

**Figure S4 STLV-1 infected cells express CADM1.**

We detected CADM1 expression using anti-human CADM1 mAb in cell lines. Si1 is a HTLV-1-immortalized monkey lymphocyte cell line. Si2 is a STLV-1-immortalized monkey lymphocyte cell line. Both T-cell lines derived from JMs express like a positive control, MT-2. ED and Molt4 are negative control for CADM1 expression.

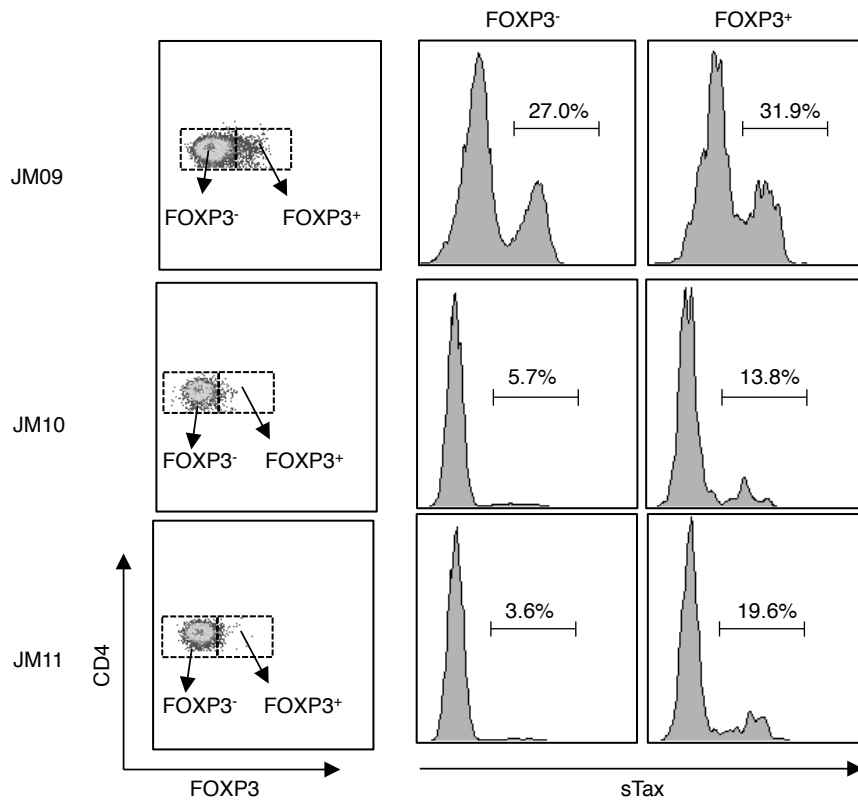

**Figure S5 sTax expression in CD4<sup>+</sup> FOXP3<sup>+</sup> cells .**

CD8-depleted monkey PBMCs were cultured for 24 hours. sTax expression was measured in CD4<sup>+</sup> FOXP3<sup>-</sup> or CD4<sup>+</sup> FOXP3<sup>+</sup> cells. Positive cells were gated based on each isotype control (>0.2%).

## Supplemental methods

### Antibodies and reagents

The following antibodies were purchased from BD bioscience: purified mAbs to mouse IgG3 (R40-82) and CD28 (37.51) and human CD28 (28.2), CCR4 (1G1: recognizes a different epitope than mogamulizumab), IFN-g (4S.B3) and IL-2 (MQ1-17H12). MAbs to human CD4 (OKT-4), CD8a (RTP-T8), CD69 (FN50), and TNF- $\alpha$  (MAB11) were from Biolegend. MAbs to mouse CD11b (M1/70), human CD45RA (GRT22) and FOXP3 (PCH101) were from e-bioscience. Anti human CADM1 (3E1) was from MBL. Fluorescence-labeled anti-CCR4 antibody (clone KM2160, Kyowa Hakko Kirin Co. Ltd.), which is the original clone of mogamulizumab, was used for detection of CCR4<sup>+</sup> cells in monkey.

The following reagents were used for cell culture: protein transport inhibitor (BD PharMingen), streptavidin-PE (BD PharMingen), OVA<sub>323-339</sub>(Bachem) tracer dye (CellTrace violet: Life Technologies) and human IL-2 (Wako). Mouse splenic T cells or monkey peripheral blood mononuclear cells (PBMCs) were depleted (<5%) or purified (>94%) using anti-mouse or anti-human CD4 or CD8 magnetic particles (BD Biosciences) according to the manufacturer's protocol. Whole overlap peptides (offset by 6 amino acids) were constructed based on the amino acid sequences of Tax, HBZ, sTax and SBZ (KURABO). All sequences of peptide used in this study are summarized in S1-S4 Table.

### Cells

Suspension cell lines and primary cells were cultured in RPMI 1640 supplemented with 10% fetal bovine serum (FBS) and antibiotics. Si1 and Si2 cell lines were cultured in RPMI 1640 supplemented with 20% fetal bovine serum (FBS), antibiotics and IL-2. 2-Mercaptoethanol was added for culture of mouse cells. Vero, RK13 and chicken embryonic fibroblasts were cultured in Dulbecco's modified Eagle medium (DMEM) supplemented with 10% newborn calf serum, antibiotics and tryptose phosphate broth. PBMCs were separated from human or monkey whole blood using Ficoll. Flow cytometry was carried out using a FACS Verse with Suite Software or FACS CantoII with FACSDiva software (BD Pharmingen). Data was analyzed by FlowJo software (Treestar).

### Promoter assay

The PathDetect pNF- $\kappa$ B-Luc Cis-Reporter Plasmid was purchased from Promega. WT-Luc (containing Tax-inducible CREs from HTLV-1 LTR) was a gift from J. Fujisawa (Kansai medical university). sTax (WT, M22 (T130A and L131S)) and SBZ (WT and LL/AA (L27A and L28A)) constructs were cloned into pCAG-HA. Vero (10<sup>5</sup>) or EL4 (2x10<sup>5</sup> cells) were transiently co-transfected 24 hours after cell seeding using Lipofectamine<sup>TM</sup> LTX (Invitrogen) with 300 ng of reporter plasmid, 30 ng of *Renilla* luciferase control vector (pRL-TK), and 600 ng of the expression plasmid. Transfected Vero and EL4 were harvested 48 hours after transfection, respectively. Firefly and *Renilla* luciferase activities were then measured using the Pickagene kit (Toyo Inki). Relative luciferase activities were calculated as the ratio of firefly to *Renilla* luciferase activities.
